# Supplementary material for: Symptoms induced by environmental irritants and health-related quality of life in patients with chronic cough - A cross-sectional study
Source: Springer Nature journal article supplement (doi:10.1186/1745-9974-7-6), 2011-01-01
Supplement: Additional file 2 [file 1745-9974-7-6-s2.pdf]

## Additional file 2

### Items of the Hull Airway Reflux Questionnaire (HARQ)

---

Within the last month, how did the following problems affect you?

- A. Hoarseness or a problem with your voice<sup>1</sup>
  - B. Clearing your throat<sup>1</sup>
  - C. Excess mucus in the throat, or drip down the back of your nose<sup>1</sup>
  - D. Retching or vomiting when you cough<sup>1</sup>
  - E. Cough on first lying down or bending over<sup>1</sup>
  - F. Chest tightness or wheeze when coughing<sup>1</sup>
  - G. Heartburn, indigestion, stomach acid coming up (or do you take medications for this, if yes score 5)<sup>1</sup>
  - H. A tickle in your throat, or a lump in your throat<sup>1</sup>
  - I. Cough with eating (during or soon after meals)<sup>1</sup>
  - J. Cough with certain foods<sup>1</sup>
  - K. Cough when you get out of bed in the morning<sup>1</sup>
  - L. Cough brought on by singing or speaking (for example, on the telephone)<sup>1</sup>
  - M. Coughing during the day rather than the night<sup>1</sup>
  - N. A strange taste in your mouth<sup>1</sup>
- 

<sup>1</sup> Scale: 0 to 5, 0 = no problem and 5 = severe/frequent problem
